# Supplementary material for: Personalized Guidance of Edge-to-Edge Transcatheter Tricuspid Valve Repair by Multimodality Imaging
Source: MDPI journal article supplement (doi:10.3390/jcm13102833), 2024-05-11
Supplement: s1 [file s1]

## SUPPLEMENTARY MATERIAL

### Supplementary Figure S1: TEE periprocedural protocol

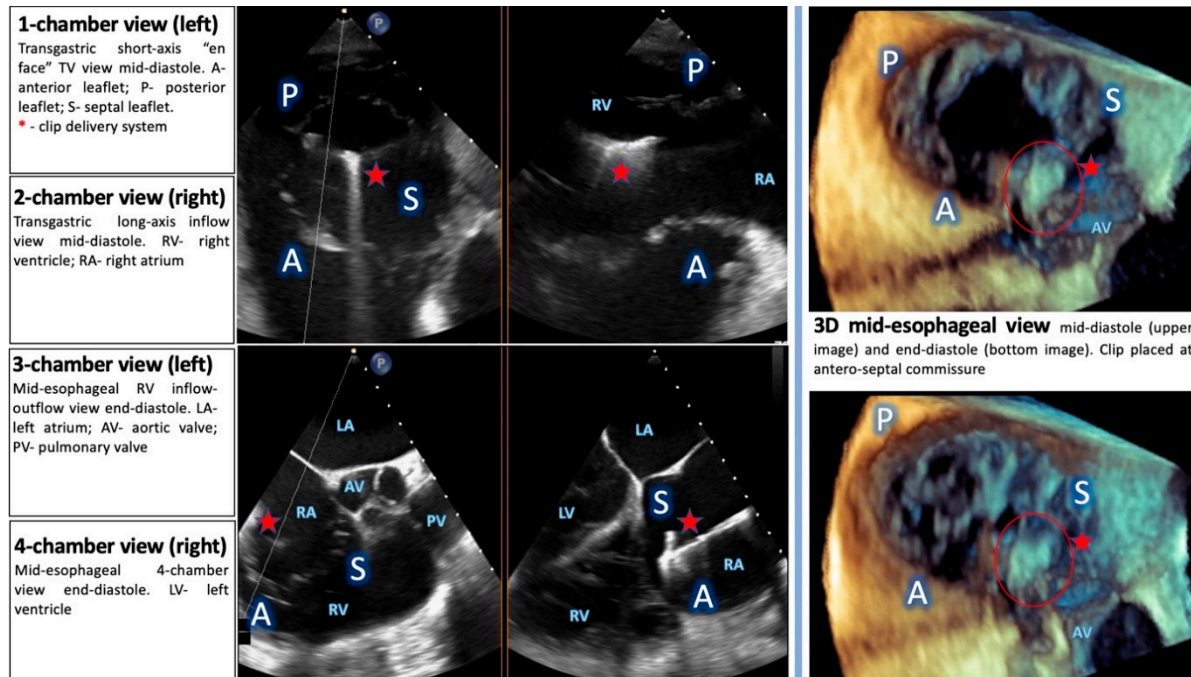

Typical periprocedural TEE (transesophageal echocardiography) views during T-TEER, grouped according to the 4 right-sided chamber views. TV: tricuspid valve, RV: right ventricle, RA: right atrium, A: anterior leaflet, P: posterior leaflet, S: septal leaflet, AV: aortic valve, PV: pulmonary valve, LV: left ventricle, \*clip delivery system

## Supplementary Figure S2: TTE follow-up

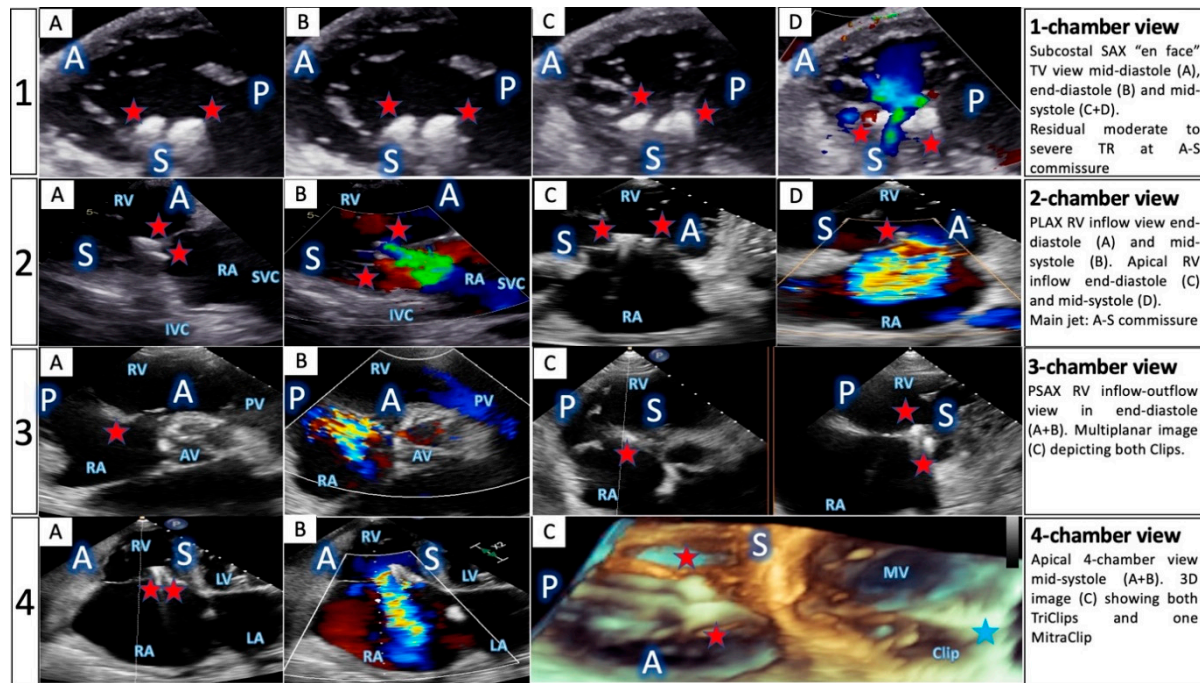

Follow-up investigation after T-TEER, based on the concept of the 4 right-sided chamber views in a patient with reduction from torrential to severe TR. A: anterior leaflet, P: posterior leaflet, S: septal leaflet, RV: right ventricle, RA: right atrium, IVC: inferior vena cava, SVC: superior vena cava, AV: aortic valve, PV: pulmonary valve, LV: left ventricle, LA: left atrium, \*2xTriClip™, \*MitraClip™.

Supplementary Figure S3. Procedural steps of multimodality imaging guidance

| Steps                                | Fluoroscopy Only | Chamber views (fluoroscopy + TTE) |           |           |           | TEE |
|--------------------------------------|------------------|-----------------------------------|-----------|-----------|-----------|-----|
|                                      |                  | 1-chamber                         | 2-chamber | 3-chamber | 4-chamber |     |
| 1. Venous access*                    |                  |                                   |           |           |           |     |
| 2. SGC advancement to RA             |                  |                                   |           |           |           |     |
| 3. Clip straddle and steering down   |                  |                                   |           |           |           |     |
| 4. Clip positioning and clocking     |                  |                                   |           |           |           |     |
| 5. Clip advancement to RV            |                  |                                   |           |           |           |     |
| 6. Grasping and leaflet insertion    |                  |                                   |           |           |           |     |
| 7. Verification of leaflet insertion |                  |                                   |           |           |           |     |

→ mandatory    → helpful    → optional

TTE: transthoracic echocardiography; TEE: transesophageal echocardiography; 1- to 4-chamber annotations refer to the 4 right-sided chamber views explained in the imaging and procedural protocols; SGC: steerable guide catheter; RA: right atrium; RV: right ventricle; \* ultrasound-guided puncture.

Supplementary Figure S4. TR reduction to baseline

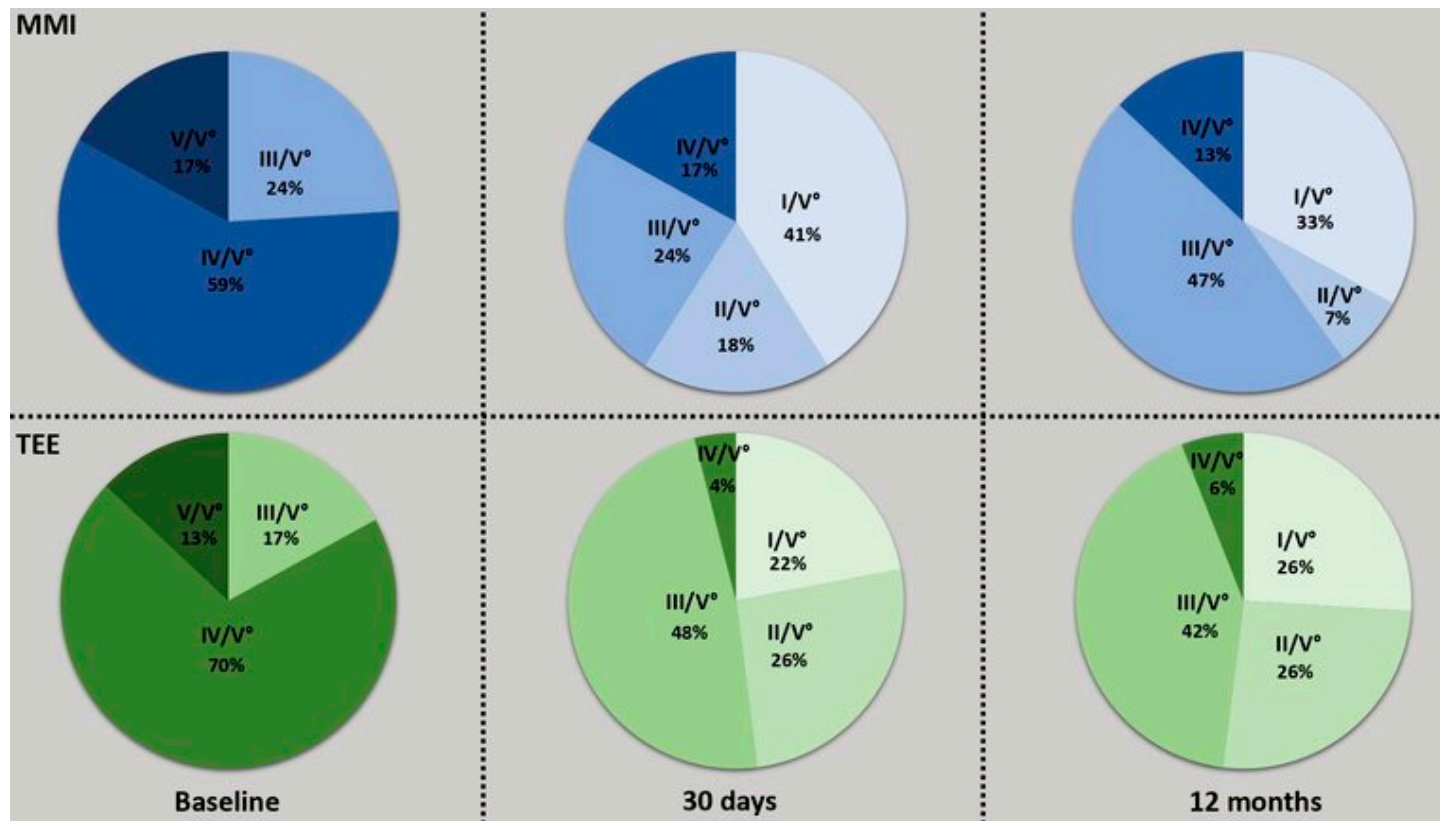

Comparison of regurgitation reduction between the multimodality (MMI) and transesophageal echocardiography (TEE) groups, according to the 5-grade classification (I/V° to V/V°) for tricuspid regurgitation (TR).

**Supplementary Table S1: TEE periprocedural protocol**

| TEE View             |                                         | Focus                                                                              |                                               |
|----------------------|-----------------------------------------|------------------------------------------------------------------------------------|-----------------------------------------------|
|                      |                                         | Morphology                                                                         | Guiding                                       |
| Bicaval view         |                                         | TV position related to caval veins                                                 | Orientation SGC towards TV                    |
| Transgastric views   | Short axis ( <b>RH 1 chamber view</b> ) | “en face” TV view                                                                  | Selecting clip target                         |
|                      | Long axis ( <b>RH 2 chamber view</b> )  | RV inflow                                                                          | Clip orientation / perpendicularity to TR jet |
| Mid-esophageal views | 0° ( <b>RH 4 chamber view</b> )         | SL length, tethering, restriction                                                  | SL grasping                                   |
|                      | 40-90° ( <b>RH 3 chamber view</b> )     | SL visualization<br>AL vs PL distinction<br>Leaflet length, tethering, restriction | Grasping all leaflets<br>Coaptation gap       |
|                      | 90-130°                                 | SL visualization<br>AL vs PL distinction<br>Leaflet length, tethering, restriction | Grasping all leaflets<br>Coaptation gap       |
| 3D-views             |                                         | Leaflets and commissures<br><br>CIED leads                                         | Clip orientation                              |

TEE: transesophageal echocardiography, RH: right heart, TV: tricuspid valve, RV: right ventricle, SGC: steering guide catheter, AL: anterior leaflet, PL: posterior leaflet, SL: septal leaflet

**Supplementary Table S2. Baseline characteristics (extended)**

| Characteristic            |           | MMI<br>(n=17) | TEE<br>(n=23) | p-value          | Characteristic                 |              | MMI<br>(n=17) | TEE<br>(n=23) | p-value |
|---------------------------|-----------|---------------|---------------|------------------|--------------------------------|--------------|---------------|---------------|---------|
| <b>Clinical</b>           |           |               |               |                  | <b>Comorbidities</b>           |              |               |               |         |
| Age (years)               |           | 83.1±4.1      | 81±5.3        | 0.182            | Atrial fibrillation            |              | 16 (94%)      | 23 (100%)     | 1.000   |
| Female sex                |           | 10 (59%)      | 10 (44%)      | 0.595            | Pulmonary hypertension         |              | 16 (94%)      | 22 (96%)      | 1.000   |
| TTE<br>acoustic<br>window | Excellent | 17 (100%)     | 0 (0%)        | <b>&lt;0.001</b> | Type 2 diabetes                |              | 6 (35%)       | 10 (43%)      | 0.773   |
|                           | Good      | 0 (0%)        | 2 (9%)        | 0.506            | Arterial hypertension          |              | 17 (100%)     | 23 (100%)     | 1.000   |
|                           | Moderate  | 0 (0%)        | 13 (57%)      | 0.004            | Hyperlipoproteinemia           |              | 6 (35%)       | 15 (65%)      | 0.405   |
|                           | Poor      | 0 (0%)        | 8 (34%)       | 0.037            | Tobacco                        |              | 2 (12%)       | 2 (9%)        | 1.000   |
| BMI (kg/m <sup>2</sup> )  |           | 22.9±1.1      | 30.4±3.7      | <b>&lt;0.001</b> | COPD                           |              | 3 (18%)       | 6 (26%)       | 0.719   |
| EuroSCORE II (%)          |           | 10.1±8.2      | 8.6±5.6       | 0.496            | CKD stage 3-5                  |              | 14 (82%)      | 19 (83%)      | 1.000   |
| Frailty (indices)         |           | 2.5±0.9       | 2.2±1.1       | 0.890            | Prior stroke / TIA             |              | 3 (18%)       | 5 (22%)       | 1.000   |
| STS Score MVR (%)         |           | 11.1±7.4      | 10.6±5.9      | 0.813            | Coronary artery disease        |              | 8 (47%)       | 15 (65%)      | 0.339   |
| STS Score MVR (%)         |           | 8.7±7.7       | 7.8±5.8       | 0.675            | Coronary bypass graft          |              | 1 (6%)        | 2 (9%)        | 1.000   |
| Major organ<br>compromise |           | 2.5±1.4       | 2.3±1.1       | 0.616            | Prior myocardial<br>infarction |              | 1 (6%)        | 5 (22%)       | 0.380   |
| NYHA class III-IV         |           | 15 (88%)      | 20 (87%)      | 1.000            | Peripheral artery disease      |              | 4 (23%)       | 7 (30%)       | 1.000   |
| RHF hospitalizations      |           | 2.8±0.7       | 2.5±0.7       | 0.188            | Pacemaker / ICD / CRT          |              | 5 (29%)       | 4 (17%)       | 0.712   |
| KCCQ Score                |           | 32.3±18.7     | 26.7±14.7     | 0.295            | Prior MV<br>repair             | percutaneous | 7 (41%)       | 3 (13%)       | 0.164   |
| 6-minute walk test        |           | 183.2±91.3    | 162.1±94.1    | 0.482            |                                | surgical     | 1 (10%)       | 1 (4%)        | 1.000   |

Data presented as n (%) or mean ± SD. BMI : body mass index ; EuroSCORE: European System for Cardiac Operative Risk Evaluation Score; STS: Society of Thoracic Surgeons predicted risk of mortality -> calculated based on either isolated mitral valve replacement (MVR) or mitral valve repair (MVR); NYHA: New York Heart Association; RHF: right heart failure; KCCQ: Kansas City Cardiomyopathy Questionnaire; COPD: chronic obstructive pulmonary disease; CKD: chronic kidney disease; TIA: transient ischemic attack; ICD: implantable cardioverter defibrillator; CRT: cardiac resynchronization therapy; MV : mitral valve

### Supplementary Table S3. Echocardiographic parameters

| Variable                               | TTE                |                     |         | TEE                |                     |         | TTE vs TEE ( $\Delta$ ) |
|----------------------------------------|--------------------|---------------------|---------|--------------------|---------------------|---------|-------------------------|
|                                        | Baseline<br>(n=17) | 12 months<br>(n=15) | p-value | Baseline<br>(n=23) | 12 months<br>(n=19) | p-value | p-value                 |
| TR parameters                          |                    |                     |         |                    |                     |         |                         |
| PISA EROA (mm <sup>2</sup> )           | 82.1±34.5          | 33.7±35.7           | <0.001  | 77.5±36            | 23.8±20.1           | <0.001  | 0.764                   |
| Mean vena contracta (mm)               | 16.2±4.8           | 7.8±5.5             | <0.001  | 16.8±4.3           | 6.2±3.2             | <0.001  | 0.542                   |
| TR volume (mL/beat)                    | 70.4±22.7          | 31.8±34.4           | <0.001  | 84.2±36.5          | 24.2±19.8           | <0.001  | 0.112                   |
| PISA (mm)                              | 9.1±1.7            | 5.9±4.3             | 0.006   | 9.5±2.3            | 5.3±2.8             | <0.001  | 0.940                   |
| Jet area (4ch) (cm <sup>2</sup> )      | 18.8±6.7           | 10.8±9.4            | <0.001  | 17.3±7.5           | 7.8±4.7             | <0.001  | 0.517                   |
| IVC diameter (mm)                      | 24.1±7.7           | 15.7±7.5            | <0.001  | 23.9±5.8           | 17.7±6.6            | <0.001  | 0.639                   |
| Hepatic vein flow reversal (%)         | 13 (77%)           | 4 (27%)             | 0.120   | 19 (83%)           | 1 (5%)              | 0.001   | 0.212                   |
| Tenting height (mm)                    | 8.5±1.8            | --                  | --      | 8.5±1.9            | --                  | --      | 0.492                   |
| Coaptation gap                         | 7.7±2.7            | --                  | --      | 8.1±2.4            | --                  | --      | 0.325                   |
| Right heart remodeling                 |                    |                     |         |                    |                     |         |                         |
| RA indexed volume (mL/m <sup>2</sup> ) | 99.3±61.9          | 58.4±39.9           | <0.001  | 86.1±33.7          | 39.1±30.4           | <0.001  | 0.882                   |
| Base RVEDD (4ch) (mm)                  | 52.1±9.1           | 48.9±9.3            | 0.001   | 55.5±6.8           | 49.6±7.4            | <0.001  | 0.464                   |
| TV annular diameter (mm)               | 44.1±7.7           | 41.1±8.7            | <0.001  | 46.1±6.5           | 41.6±7.1            | <0.001  | 0.101                   |
| Ventricular systolic function          |                    |                     |         |                    |                     |         |                         |



|                                                                                                                                                                                                                                                                                                                                                                                                                                                               |            |            |        |            |            |        |       |
|---------------------------------------------------------------------------------------------------------------------------------------------------------------------------------------------------------------------------------------------------------------------------------------------------------------------------------------------------------------------------------------------------------------------------------------------------------------|------------|------------|--------|------------|------------|--------|-------|
| RV TAPSE (mm)                                                                                                                                                                                                                                                                                                                                                                                                                                                 | 16.1±4.1   | 20.6±5.2   | <0.001 | 15.7±3.8   | 19.3±3.4   | <0.001 | 0.702 |
| RV FAC (%)                                                                                                                                                                                                                                                                                                                                                                                                                                                    | 33.5±7.2   | 41.8±10    | 0.023  | 29.5±8.7   | 33.3±15.3  | 0.029  | 0.469 |
| Annular velocity TDI (cm/s)                                                                                                                                                                                                                                                                                                                                                                                                                                   | 9.2±3.2    | 13.7±4.3   | 0.023  | 8.7±1.9    | 17.3±11.4  | 0.002  | 0.729 |
| LV ejection fraction (%)                                                                                                                                                                                                                                                                                                                                                                                                                                      | 51.5±12.4  | 52.6±8.9   | 0.095  | 53.9±12.9  | 54.1±9.9   | 0.054  | 0.628 |
| <i>Hemodynamic parameters</i>                                                                                                                                                                                                                                                                                                                                                                                                                                 |            |            |        |            |            |        |       |
| TR peak velocity (cm/s)                                                                                                                                                                                                                                                                                                                                                                                                                                       | 311.9±46.9 | 282.3±33.7 | 0.008  | 331.2±40.1 | 287.6±54.2 | <0.001 | 0.692 |
| PAPs                                                                                                                                                                                                                                                                                                                                                                                                                                                          | 58±11.7    | 48.3±7.3   | 0.015  | 62.8±10.6  | 48.4±14.8  | <0.001 | 0.718 |
| LV stroke volume (mL)                                                                                                                                                                                                                                                                                                                                                                                                                                         | 54.8±10.6  | 60.1±9.7   | <0.001 | 54.2±8.8   | 56.7±10    | 0.300  | 0.410 |
| Cardiac output (L/min)                                                                                                                                                                                                                                                                                                                                                                                                                                        | 3.9±0.9    | 4.4±0.7    | 0.002  | 3.8±0.9    | 3.9±0.7    | 0.501  | 0.108 |
| RV stroke volume (mL)                                                                                                                                                                                                                                                                                                                                                                                                                                         | 60.5±10.9  | 65.4±10.4  | 0.001  | 59.1±10.8  | 62.2±11.2  | 0.013  | 0.261 |
| Data presented as n (%) or mean ± SD. PISA EROA: proximal isovelocity surface area effective regurgitant orifice area; TR: tricuspid regurgitation; ch: chamber; IVC : inferior vena cava ; RA: right atrium; RVEDD: right ventricular end-diastolic diameter; TV: tricuspid valve; TAPSE: tricuspid annular plane systolic excursion; FAC: fractional area change; TDI: tissue doppler imaging; LV: left ventricle; PAPs: pulmonary systolic artery pressure |            |            |        |            |            |        |       |



## **VIDEO LEGENDS**

### **Video S1. One-chamber TTE view**

Video illustration of the 1-chamber right heart view in a patient with massive tricuspid regurgitation (Figure 1), containing the 2D subcostal short axis and the 3D “en face” tricuspid valve visualization derived from subcostal, apical or parasternal views.

### **Video S2. TTE screening for the 4 right-sided chamber views**

Video compilation matching Figure 1 (Main text)

### **Video S3. Procedural steps of MMI guided T-TEER**

Video sequence matching Figure 4 (Main text)
